# Supplementary material
Source: ML conference proceedings conference paper supplement (https://openreview.net/forum?id=vv3cocNsEK)
Supplement: supplementary_material [file attachment]

---

# Supplementary material for: HT-Step: Aligning Instructional Articles with How-To Videos

---

Anonymous Author(s)

Affiliation

Address

email

1 This supplementary material provides more comprehensive statistics about the dataset (Section C),  
2 architecture and implementation details for the baselines discussed (Section E), extra details about  
3 the evaluation protocol (Section G), a more detailed overview of the activity and step taxonomy  
4 (Section D), a breakdown of model performance by activity (Section F), and a datasheet containing  
5 detailed documentation about HT-Step (Section I).

## 6 A Supplementary .zip contents

7 This supplementary material contains the following files:

- 8 • **taxonomy.csv**: CSV file with the full step taxonomy in. For every step we list its corre-  
9 sponding activity (and its variation if applicable), headline and paragraph.
- 10 • **annotation\_sample.json**: Sample annotations for 100 videos from our training split. Refer  
11 to section I.2 in our Datasheet for detailed explanation of the annotations format.
- 12 • **step\_examples.mp4**: Video with step examples from various activities and videos in our  
13 dataset.
- 14 • **1\_gt\_annots\_-2vbgoZc-RI.mp4, 2\_gt\_annots\_4Xifp6umIZc.mp4, 3\_gt\_annots\_-**  
15 **2maV1TTL5U.mp4**: Example videos with visualization of step annotations.

## 16 B Video examples

17 We have included three videos from the HT-Step training set with overlaid step annotations. In the  
18 beginning of each video, we indicate its activity, variation and the article steps.

- 19 • Videos -2vbgoZc-RI and 4Xifp6umIZc: These are videos showing two variations of the  
20 same activity: *Make Eggless Cookies*. FM indicates full match, while PM partial match.  
21 Note that there are non-groundable steps.
- 22 • Video -2maV1TTL5U: This is a video showing how to *Make Bollilos*. Note that there are  
23 non-groundable steps, like 9. *Fold each roll into thirds*. Also, the video showcases an  
24 example of a composite step that is partially groundable in each temporal segment. The step  
25 *Punch down and knead the dough* has multiple relevant temporal segments. One of them  
26 just shows the sub-step of punching down the dough, while a later one shows the kneading.

## 27 C Extra statistics

28 Figures 1a-1i contain additional statistics about HT-Step.

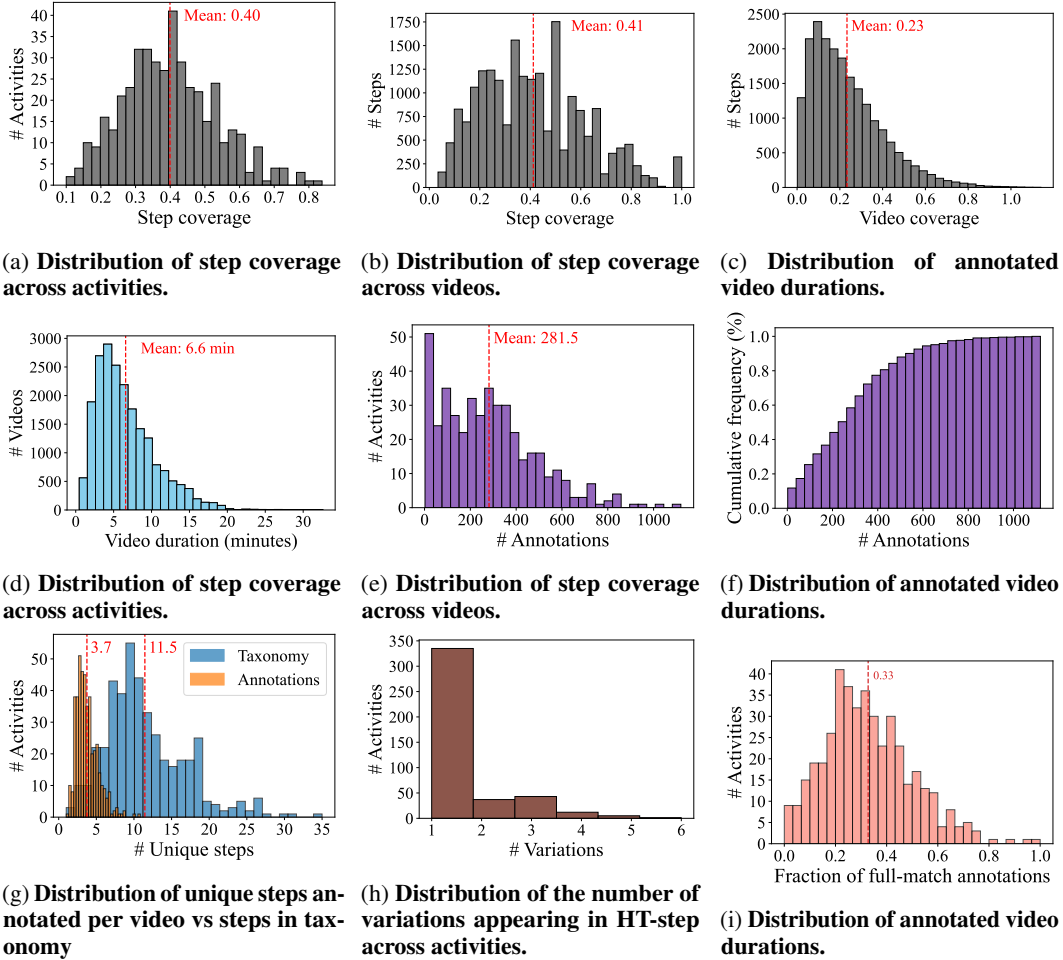

## 29 D Taxonomy

30 We provide the full step taxonomy in `taxonomy.csv`. Every step includes its corresponding activity,  
 31 headline and paragraph, as well as variation information.

## 32 E Baselines implementation details

33 We train all the baselines on top of the same feature sequences, extracted from frozen backbones.

34 **TimeSformer (TS) features.** The TimeSformer features are extracted using the public model<sup>1</sup> of [7]  
 35 pre-trained with distant supervision on HowTo100M. We obtain 1 feature per second, by resampling  
 36 the video at 8 fps and extracting features with a stride of 8 frames. The feature dimensionality is 768.

<sup>1</sup>[https://dl.fbaipublicfiles.com/video-distant-supervision/TimeSformer\\_divST\\_8x32\\_224\\_HowTo100M\\_pretrained.pth](https://dl.fbaipublicfiles.com/video-distant-supervision/TimeSformer_divST_8x32_224_HowTo100M_pretrained.pth)

37 **S3D features.** The S3D features are extracted using the published model<sup>2</sup> of [9] pre-trained with  
38 MIL-NCE [9]. We obtain 1 feature vector per second, by resampling the video at 16 fps and extracting  
39 features with a stride of 16 frames. The feature dimensionality is 1024.

40 **ActionFormer.** We use the official ActionFormer implementation<sup>3</sup> provided by the authors[13].  
41 We set the number of classes to 4958 *i.e.*, one detection output for each step in the taxonomy. We set  
42 the max sequence length to 512 and train for 20 epochs with a batch size of 16, using the AdamW  
43 optimiser with cosine learning rate schedule, base learning rate of  $1e-4$  and 5 warm-up epochs on a  
44 single Nvidia Tesla V100 GPU with 32GB of memory.

45 **ActionFormer-T.** ActionFormer-T is trained with the exact same hyper-parameters, loss and labels  
46 as ActionFormer. We extract the text representations, using the MPNet implementation provided  
47 by the `sentence_transformers` library<sup>4</sup>. The text embeddings are frozen, so no gradients are  
48 backpropagated into the pre-trained language model. A single linear layer is used to project between  
49 the 768-dimensional text embeddings and the 512-dimensional video embeddings. Step text  
50 descriptions from different sources (e.g. headline, paragraph, activity, see also Table 3 of the main  
51 paper) are combined by simple concatenation at the text level, *i.e.* the combined sentences including  
52 all three have the form “Activity: Headline. Paragraph”.

53 **UMT.** For UMT, we use the authors’ official code<sup>5</sup>. We train models with learning rate  $1e-3$   
54 and batch size 64 and train for 200 epochs. We use only the unimodal encoder for video (we do not  
55 use the audio encoder, or the cross-attention modules). All remaining hyperparameters follow the  
56 configuration for the QVHighlights task provided by the authors.

57 **MT+BCE.** The input to our temporal article grounding baseline is a temporal sequence of visual  
58 features extracted with a sliding window (using either the TimeSformer or S3D backbones as  
59 explained above), and a sequence of step sentences (consisting of the activity name and the article  
60 step headlines). We base our model on the VINA [8] architecture by removing the additional  
61 narrations modality, *i.e.*, we do not use the narration unimodal encoders, positional encodings and  
62 the alignments of steps to narrations or narrations to video. We use the TAN<sup>6</sup> codebase for our  
63 implementation. All of the architecture hyperparameters (e.g., number of Multimodal Transformer  
64 layers, embedding dimensions etc.) are adopted from VINA. The only difference is the maximum  
65 length of the input video which we increase to 1200 seconds to account for the longer videos in the  
66 HT-Step training set.

67 To obtain temporal segment predictions for each article step from the Multimodal Transformer  
68 outputs, we: (1) compute the normalized dot product between each step contextual embedding and  
69 each video clip contextual embedding. This results in a  $T \times S$  alignment matrix, where  $T$  is the  
70 number of timesteps and  $S$  is the number of steps. (2) We pass these similarities through a sigmoid  
71 activation (with temperature 0.07) to obtain a confidence score about whether each timestep  $t$  is  
72 aligned with step  $s$ , (3) we post-process the temporal sequence of confidence scores for each step  
73 with an 1D blob detection routine to obtain temporal segments at multiple scales. In particular, we  
74 apply Laplacian of Gaussian filters at 13 scales, covering Gaussian standard deviations from 1 to  
75 480 [12].

76 The model is trained with binary cross-entropy loss applied at each temporal timestep and for each  
77 article step. We train our model for 9 epochs using the same optimizer, learning rate and batch size as  
78 VINA [8].

79 Adding paragraph information: For our ablations in Table 3 of the main paper, we added paragraph  
80 information to the MT+BCE model simply by interleaving step headlines with step paragraph

<sup>2</sup>[https://github.com/antoine77340/S3D\\_HowTo100M](https://github.com/antoine77340/S3D_HowTo100M)

<sup>3</sup>[https://github.com/happyharrycn/actionformer\\_release](https://github.com/happyharrycn/actionformer_release)

<sup>4</sup><https://huggingface.co/sentence-transformers/paraphrase-mpnet-base-v2>

<sup>5</sup><https://github.com/TencentARC/UMT/tree/main>

<sup>6</sup><https://github.com/TengdaHan/TemporalAlignNet>

81 sentences. In other words, we tokenize the article into sentences (with a maximum of 28 sentences  
 82 per step) and we encode and feed that sequence of sentences to the Multimodal Transformer. We  
 83 use the same positional encoding for all sentences associated with the same article step. In order to  
 84 obtain a single contextual embedding for each step, we max pool the embeddings of the headline and  
 85 paragraph sentences of that step.

86 Model weights initialization: We train all variants of MT+BCE from scratch, except for the model  
 87 in the last row of Table 2, which was trained after initializing the unimodal encoders, positional  
 88 encodings and Multimodal Transformer weights using a VINA model pretrained on the HTM370k [3]  
 89 subset of HowTo100M using pseudo-labels for wikiHow steps (and no ASR narrations) [8]. For this  
 90 experiment, we adopt the same maximum video length as VINA (1024 seconds).

## 91 **F Per-activity predictions**

92 In Table 1 we show the per-activity AP breakdown of the performance of the two best models. We  
 93 show the 25 highest and 25 lowest scoring activities, ranked by the performance of the ActionFormer  
 94 detection model. Note that activities that are challenging for the fixed taxonomy, detection model  
 95 (such as Cook Pork Tenderloin for which the AP is 0.62%) are handled better by the temporal  
 96 grounding model (achieving 28.9% AP for Cook Pork Tenderloin). For this particular example of  
 97 *Cook Pork Tenderloin*, this can be explained since this activity has only 4 examples in the training set.  
 98 Therefore, the detection model does not have enough training samples to learn a good representation  
 99 for the steps of this activity. On the other hand, the temporal article grounding model, that has been  
 100 initialized with a model trained with weak-supervision on a much larger dataset (HTM370k) can  
 101 perform better in this few-shot scenario. Another interesting observation is that for some activities  
 102 the detection-based model outperforms language-based grounding.

## 103 **G Evaluation protocol details**

### 104 **G.1 Article-grounding AP metric**

105 Approaches in our proposed temporal article grounding benchmark are evaluated using Article  
 106 Grounding mean Average Precision (AGrd. mAP) over temporal IoU thresholds from 0.3 to 0.7 with  
 107 a step size set to 1 (as in existing benchmarks [4]), and using three fixed tIoU thresholds at 0.3, 0.5  
 108 and 0.7. As explained in the main paper, our proposed metric computes an AP per activity (which  
 109 might be associated with multiple articles if it has variations) by treating all article steps associated  
 110 with that activity as class-agnostic text queries (similar to the temporal grounding Average Precision  
 111 introduced in [6]). The per-activity AP is only computed on videos demonstrating each particular  
 112 activity. The final article-grounding mAP is computed by averaging the per-activity APs. Our  
 113 mAP-based metric is more suitable for the temporal article grounding task than existing recall-based  
 114 metrics for grounding [1, 14] which ignore non-groundable steps, or frame-wise metrics for step  
 115 detection [11], which ignore the temporal extent of each segment.

### 116 **G.2 Breakdown of article-grounding mAP per match type (*full* vs *partial*)**

117 In Table 4 of our main paper, we report article-grounding mAP computed per step match type (*full*  
 118 vs *partial*). The mAP for full matches was computed separately for step queries that only have  
 119 fully-matching temporal segments (or no matching segments) in their corresponding video. Step  
 120 queries that have both full and partial matches in the same video were ignored from the computation  
 121 of the mAP on full matches. Furthermore, APs are only computed for activities that have ground-truth  
 122 step queries with full matches and averaged over those. Overall, the mAP for full matches was  
 123 computed based on 78 activities, with 1176 ground-truth instances. The mAP for partial matches was  
 124 computed in a corresponding manner, covering 79 activities and 2375 ground-truth instances.

Table 1: **Breakdown of AP performance per activity on the seen test set (S1).** We show the 25 highest and 25 lowest scoring activities, ranked by the performance of the ActionFormer model.

| Activity                                 | Model        |              |
|------------------------------------------|--------------|--------------|
|                                          | ActionFormer | MT+BCE(VINA) |
| Make Lunch Box Oatmeal Cookies           | 55.02        | 66.65        |
| Make Chicken Liver Pate                  | 51.94        | 45.56        |
| Deep Fry a Turkey                        | 51.56        | 43.02        |
| Make Tomato Pie                          | 47.97        | 38.43        |
| Make Buttermilk Fried Chicken            | 45.53        | 39.40        |
| Bake a Sweet Potato Pie                  | 43.62        | 25.70        |
| Make Scotch Eggs                         | 42.90        | 41.82        |
| Make Pecan Crusted Blackened Catfish     | 42.37        | 26.54        |
| Make Vegetable Paniyaram                 | 42.30        | 39.91        |
| Cook Arepas                              | 42.16        | 43.75        |
| Prepare Mexican Chilaquiles              | 41.15        | 40.09        |
| Make Chiles Rellenos                     | 40.82        | 35.48        |
| Make Beef Stroganoff                     | 40.59        | 27.03        |
| Clarify Butter                           | 40.38        | 39.71        |
| Make Toad in the Hole                    | 38.56        | 43.81        |
| Make Focaccia                            | 38.54        | 39.11        |
| Clean Flounder                           | 37.95        | 15.60        |
| Make Chicken Piccata                     | 37.77        | 44.94        |
| Brine, Truss, and Roast a Turkey         | 36.15        | 49.03        |
| Grill Bacon                              | 35.89        | 55.26        |
| Make Eggplant Pasta Sauce                | 35.31        | 30.93        |
| Make Mofongo                             | 35.05        | 43.49        |
| Make Saltimbocca                         | 34.84        | 34.21        |
| Cook Brussels Sprouts with Chestnuts     | 34.52        | 42.86        |
| Make Beignets                            | 34.34        | 40.71        |
| ...                                      |              |              |
| Make White Chili                         | 15.79        | 11.41        |
| Make Fairy Cakes with Self Raising Flour | 15.51        | 36.88        |
| Make Chicken Cacciatore                  | 15.42        | 28.50        |
| Make Grilled Artichokes                  | 15.19        | 27.35        |
| Make Healthier Fish Sticks               | 14.98        | 23.45        |
| Bake a Queen Elizabeth Cake              | 14.91        | 27.57        |
| Make Coconut Rice                        | 14.82        | 31.91        |
| Make Hostess Twinkies                    | 14.54        | 24.67        |
| Cook Cube Steak                          | 13.20        | 34.79        |
| Make Bannock                             | 12.75        | 17.94        |
| Make Mango Chutney                       | 12.74        | 11.38        |
| Make Overnight Caramel Pecan Rolls       | 12.47        | 18.48        |
| Make Vegan Ceviche                       | 11.96        | 4.85         |
| Cook Black Eyed Peas                     | 11.44        | 19.02        |
| Make a Cheese Crisp                      | 9.32         | 14.16        |
| Cook Bacon in the Microwave              | 9.14         | 40.50        |
| Make Italian Ice                         | 9.01         | 19.73        |
| Make Quick and Easy Sausage Rolls        | 8.27         | 16.67        |
| Braai Steak                              | 8.08         | 9.27         |
| Make a Hearty Stew                       | 7.73         | 31.03        |
| Make Mediterranean Vegetable Cheese Pie  | 6.19         | 16.37        |
| Make Hungarian Goulash                   | 6.00         | 18.43        |
| Make Bacon Toffee                        | 3.92         | 8.15         |
| Make Blueberry Strudel                   | 1.96         | 9.29         |
| Cook Pork Tenderloin                     | 0.62         | 28.94        |
| <b>mAP</b>                               | <b>25.4</b>  | <b>29.8</b>  |

## 125 H Training, validation, and test splits

126 We have included details about the training, validation and test splits in Section 3.2 of the main paper.  
127 Here we add some comments.

128 **Seen val/test set (S1).** We note that these sets are balanced, each containing 600 videos in total,  
129 5 videos per each of 120 activities, with an overlap between validation and test amounting to 63  
130 activities. Labels are released for the val set, while labels for the seen test set are withheld and a  
131 fair evaluation protocol on this set is supported via a test server that will be made available to the  
132 community.

133 **Unseen val/test set (S2).** Note that the headlines or paragraphs of some steps in the unseen val/test sets  
134 may be very similar to steps of the activities included in the training set, due to the compositionality  
135 of recipes. For example, the unseen activity of *Make Poutine* contains the step “Add the garlic and  
136 shallot” which is similar to steps such as “Add the garlic and cook for 30 seconds” from the seen  
137 activity *Make a Hearty Stew* and “add the garlic slices and cook for 1 minute.” from *Make Tumbet*.  
138 Evaluation on the unseen test set will be made possible through the test server.

## I Datasheet for HT-Step

In this section we provide a detailed documentation about our dataset, following the format introduced by Gebru et al. [2]. Our HT-Step dataset provides a new set of annotations for a subset of *existing* videos from the HowTo100M dataset. The annotations depend on the HowTo100M [10] videos (no new videos were collected or recorded) and wikiHow articles from the wikiHow dataset [5]. In all our responses below, the term “data” specifically refers to the *annotations*, not the HowTo100M videos or the wikiHow articles associated with HT-Step, unless otherwise noted.

### I.1 Motivation

a) **For what purpose was the dataset created?** Was there a specific task in mind? Was there a specific gap that needed to be filled? Please provide a description.

HT-Step was created to support research in procedural video understanding. It provides a collection of segment-level step annotations that greatly surpasses existing labeled datasets in this area along multiple axes: scale, number of activities, and richness of natural language step descriptions.

b) **Who created the dataset (e.g., which team, research group) and on behalf of which entity (e.g., company, institution, organization)?**

To maintain the anonymity of this submission, we will provide these details upon publication.

c) **Who funded the creation of the dataset?** If there is an associated grant, please provide the name of the grantor and the grant name and number.

To maintain the anonymity of this submission, we will provide these details upon publication.

### I.2 Composition

a) **What do the instances that comprise the dataset represent (e.g., documents, photos, people, countries)?** Are there multiple types of instances (e.g., movies, users, and ratings; people and interactions between them; nodes and edges)? Please provide a description.

Each instance is a set of temporal segment annotations, denoting relevant temporal segments, for a specific article step on a particular video in HowTo100M [10]. We refer the reader to Listing 1 for an example of the annotation format as well as to the sample json file that we provide `annotation_sample.json`, containing the annotations on 100 training videos.

b) **How many instances are there in total (of each type, if appropriate)?** There are 116k segment-level annotations.

Listing 1: Example annotation in a JSON format

```
{
  "-2maV1TTL5U": [
    {
      "segment": [
        103.73678,
        118.19032
      ],
      "step_label": "Proof the yeast.",
      "partial": "Full Match",
      "activity": "Make Bolillos",
      "step_index": 0,
      "variation_index": "1",
      "global_step_index": 3167
    },
    {
      "segment": [
        124.4,
        146.6
      ],

```

```

187         ],
188         "step_label": "Add most of the remaining dough ingredients.",
189         "partial": "Full Match",
190         "activity": "Make Bolillos",
191         "step_index": 1,
192         "variation_index": "2",
193         "global_step_index": 3168
194     },
195     ...
196 ]
197 "-2vbg0Zc-Rl": [
198     ...
199 ]
200 }
201

```

---

202 **c) Does the dataset contain all possible instances or is it a sample (not necessarily random)**  
203 **of instances from a larger set?** If the dataset is a sample, then what is the larger set? Is the  
204 sample representative of the larger set (e.g., geographic coverage)? If so, please describe how  
205 this representativeness was validated/verified. If it is not representative of the larger set, please  
206 describe why not (e.g., to cover a more diverse range of instances, because instances were withheld  
207 or unavailable).

208 HT-Step covers a small and focused subset of HowTo100M. It amounts to approximately 1.7% of the  
209 total videos and it covers 433 cooking activities. The cooking domain was selected as it represents a  
210 large part of HowTo100M (approximately a third), contains relatively low-complexity tasks which  
211 can be annotated by non-experts that are often procedural in nature. The 433 tasks represent cooking  
212 activities for which HowTo100M contains at least 70 videos. Some manual filtering was done to keep  
213 only procedural activities. The final list of annotated videos in HT-Step was determined directly by  
214 the annotators – videos that were not related to the corresponding activity were rejected.

215 **d) What data does each instance consist of? “Raw” data (e.g., unprocessed text or images) or**  
216 **features? In either case, please provide a description.**

217 The annotation instances are organized per video, *i.e.* each video entry contains a list of annotations.  
218 Each annotation contains a temporal segment, the step index within the activity, the global step index  
219 (within the taxonomy), the variation index, an partial or full match indicator and the activity name.  
220 For an example, please see Listing 1.

221 **e) Is there a label or target associated with each instance?** If so, please provide a description.  
222 There are various labels associated with each instance. We provide the definition of each field below.

- 223 • **segment:** Time interval, represented as start and end timestamps in seconds.
- 224 • **activity:** The video’s activity.
- 225 • **step\_label:** The step headline text (as appearing in the corresponding wikiHow article).
- 226 • **variation\_index:** The index of the activity variation, if any (listed in the taxonomy).
- 227 • **step\_index:** The (local) index of the step within the activity.
- 228 • **global\_step\_index:** The global index of the step within the whole taxonomy.
- 229 • **partial:** One of “Full Match” or “Partial Match”, indicating whether the annotation is full or  
230 partial.

231 **f) Is any information missing from individual instances?** If so, please provide a description,  
232 explaining why this information is missing (e.g., because it was unavailable). This does not include  
233 intentionally removed information, but might include, e.g., redacted text.

234 No information was removed intentionally, the annotations are provided as marked by the annotators.

235 **g) Are relationships between individual instances made explicit (e.g., users’ movie ratings, social**  
236 **network links)?** If so, please describe how these relationships are made explicit.



237 This dataset does not provide any metadata about relationships between individual instances, besides  
238 the grouping of videos by activity.

239 **h) Are there recommended data splits (e.g., training, development/validation, testing)?** If so,  
240 please provide a description of these splits, explaining the rationale behind them.

241 We provide data splits for training, validation, and testing (including seen and unseen val/test splits).  
242 Full details about the splits are given in Section 3.2 of the main paper. We will release the full  
243 annotations for the training and seen validation splits and withholding the test (seen/unseen) splits.  
244 To facilitate evaluation, we will set up and maintain a test server on EvalAI. Participants can upload  
245 their results to the server, where they will be evaluated automatically.

246 **i) Are there any errors, sources of noise, or redundancies in the dataset?** If so, please provide a  
247 description.

248 As we describe in Section 3.2 of the main paper, we followed a strict QA process to ensure the quality  
249 of the annotations. Full QA of the dataset was too costly, therefore only a fraction (13%) has been  
250 fully reviewed. Despite this effort, as human annotators can be prone to mistakes, it is possible that  
251 there are noisy annotations. To contain noise to a minimum for evaluation, we created the two test  
252 sets exclusively from annotations on videos that had were QA reviewed.

253 **j) Is the dataset self-contained, or does it link to or otherwise rely on external resources (e.g.,  
254 websites, tweets, other datasets)?** If it links to or relies on external resources, a) are there guarantees  
255 that they will exist, and remain constant, over time; b) are there official archival versions of the  
256 complete dataset (i.e., including the external resources as they existed at the time the dataset was  
257 created); c) are there any restrictions (e.g., licenses, fees) associated with any of the external resources  
258 that might apply to a dataset consumer? Please provide descriptions of all external resources and any  
259 restrictions associated with them, as well as links or other access points, as appropriate.

260 HT-Step is a new set of annotations on existing videos of HowTo100M. These videos are publicly  
261 available through YouTube. There is no guarantee that the videos will always remain online and  
262 accessible, but this is a known issue with YouTube-mined datasets. The majority of the videos are  
263 available for free, under the policies of YouTube and may have individual licenses.

264 HT-Step will be released under the CC BY NC SA licence, which is can be found at <https://creativecommons.org/licenses/by-nc-sa/2.0/>. There is no dependency on wikiHow as  
265 the text for the steps is included and self-contained within the dataset’s taxonomy and individual  
266 annotations.  
267

268 **k) Does the dataset contain data that might be considered confidential (e.g., data that is  
269 protected by legal privilege or by doctor–patient confidentiality, data that includes the content  
270 of individuals’ non- public communications)?** If so, please provide a description.

271 No information contained in HT-Step is considered confidential.

272 **l) Does the dataset contain data that, if viewed directly, might be offensive, insulting, threatening,  
273 or might otherwise cause anxiety?** If so, please describe why.

274 N/A.

275 **m) Does the dataset identify any subpopulations (e.g., by age, gender)?** If so, please describe how  
276 these subpopulations are identified and provide a description of their respective distributions within  
277 the dataset.

278 No.

279 **n) Is it possible to identify individuals (i.e., one or more natural persons), either directly or  
280 indirectly (i.e., in combination with other data) from the dataset?** If so, please describe how.

281 It should not be possible to identify individuals from the labels provided in HT-Step. All the annotation  
282 text is taken from a fixed taxonomy of 4,958 steps, that were gathered from an independent source

283 (wikiHow). Therefore there is no way to inject information specific to individual videos through  
284 them.

285 o) Does the dataset contain data that might be considered sensitive in any way (e.g., data  
286 that reveals race or ethnic origins, sexual orientations, religious beliefs, political opinions or  
287 union memberships, or locations; financial or health data; biometric or genetic data; forms  
288 of government identification, such as social security numbers; criminal history)? If so, please  
289 provide a description.

290 N/A.

### 291 I.3 Collection Process

292 a) How was the data associated with each instance acquired? Was the data directly observable (e.g.,  
293 raw text, movie ratings), reported by subjects (e.g., survey responses), or indirectly inferred/derived  
294 from other data (e.g., part-of-speech tags, model-based guesses for age or language)? If the data was  
295 reported by subjects or indirectly inferred/derived from other data, was the data validated/verified? If  
296 so, please describe how.

297 Annotators directly watched each video and were also given a full list of the article steps (headlines  
298 and paragraphs) that they were asked to temporally localize in the video.

299 b) What mechanisms or procedures were used to collect the data (e.g., hardware apparatuses  
300 or sensors, manual human curation, software programs, software APIs)? How were these  
301 mechanisms or procedures validated?

302 We used an internal tool developed for web-based annotation. The same tool has been used for the  
303 annotation of other public datasets. To maintain the anonymity of this submission, we will provide  
304 more details upon publication.

305 c) If the dataset is a sample from a larger set, what was the sampling strategy (e.g., deterministic,  
306 probabilistic with specific sampling probabilities)?

307 See our response in D.2.c.

308 d) Who was involved in the data collection process (e.g., students, crowdworkers, contractors)  
309 and how were they compensated (e.g., how much were crowdworkers paid)?

310 The collection was done by a third party vendor and annotators were compensated by contract. The  
311 vendor was involved with multiple annotation projects involved with the vendor, and thus their exact  
312 compensation is not available to us.

313 e) Over what timeframe was the data collected? Does this timeframe match the creation  
314 timeframe of the data associated with the instances (e.g., recent crawl of old news articles)? If  
315 not, please describe the timeframe in which the data associated with the instances was created.

316 The annotations were collected over approximately 2 months. This timeframe does not match  
317 the creation timeframes of the videos. These vary across the videos and are, due to the nature of  
318 HowTo100M, which was mined from YouTube, not easy to determine.

319 f) Were any ethical review processes conducted (e.g., by an institutional review board)? If so,  
320 please provide a description of these review processes, including the outcomes, as well as a link or  
321 other access point to any supporting documentation.

322 Yes. This annotation project went through a rigorous internal privacy and ethical compliance review  
323 process. To maintain the anonymity of this submission, we will provide more details upon publication.

324 g) Did you collect the data from the individuals in question directly, or obtain it via third parties  
325 or other sources (e.g., websites)?

326 We did not collect or record new videos as part of HT-Step annotation. We did collect annotations on  
327 these videos from annotators managed by a third-party vendor as discussed above. Annotations were  
328 collected a web-based, internal annotation tool.

329 **h) Were the individuals in question notified about the data collection?** If so, please describe (or  
330 show with screenshots or other information) how notice was provided, and provide a link or other  
331 access point to, or otherwise reproduce, the exact language of the notification itself.

332 **i) Did the individuals in question consent to the collection and use of their data?** If so, please  
333 describe (or show with screenshots or other information) how consent was requested and provided,  
334 and provide a link or other access point to, or otherwise reproduce, the exact language to which the  
335 individuals consented.

336 Yes, see above.

337 **j) If consent was obtained, were the consenting individuals provided with a mechanism to revoke  
338 their consent in the future or for certain uses?** If so, please provide a description, as well as a link  
339 or other access point to the mechanism (if appropriate).

340 No.

341 **k) Has an analysis of the potential impact of the dataset and its use on data subjects (e.g., a data  
342 protection impact analysis) been conducted?** If so, please provide a description of this analysis,  
343 including the outcomes, as well as a link or other access point to any supporting documentation.

344 No.

#### 345 **I.4 Processing, cleaning, labeling**

346 **a) Was any preprocessing/cleaning/labeling of the data done (e.g., discretization or bucketing,  
347 tokenization, part-of-speech tagging, SIFT feature extraction, removal of instances, processing  
348 of missing values)?** If so, please provide a description. If not, you may skip the remaining questions  
349 in this section.

350 We did not directly parse wikiHow articles but used the parsed version provided by [https://](https://github.com/mahnazkoupae/WikiHow-Dataset)  
351 [github.com/mahnazkoupae/WikiHow-Dataset](https://github.com/mahnazkoupae/WikiHow-Dataset). This corpus contains metadata that we used to  
352 determine which sets of steps are grouped into variations (i.e. they are organized as methods). The  
353 variations were obtained automatically, but we needed to correct a small number of them manually.  
354 The two most common causes for manual intervention were that either i) alternative variations of an  
355 activity were not flagged as such but listed as integral steps, or ii) subgroups of procedural steps were  
356 wrongly listed as alternative methods.

357 **b) Was the “raw” data saved in addition to the preprocessed/cleaned/labeled data (e.g., to  
358 support unanticipated future uses)?** If so, please provide a link or other access point to the “raw”  
359 data.

360 No. The final annotations format contains all the information collected by the process, except for the  
361 time of annotation and annotator ids.

362 **c) Is the software that was used to preprocess/clean/label the data available?** If so, please provide  
363 a link or other access point.

364 N/A.

#### 365 **I.5 Uses**

366 **a) Has the dataset been used for any tasks already?** If so, please provide a description.

367 The full HT-Step dataset is not public yet, so no other papers have used it. As explained in the main  
368 paper, we form the seen validation and test split (S1) from [8], which introduces this small subset of  
369 the dataset and uses it for evaluating weakly-supervised temporal article grounding models.

370 **b) Is there a repository that links to any or all papers or systems that use the dataset?** If so,  
371 please provide a link or other access point.

372 N/A.

373 **c) What (other) tasks could the dataset be used for?**

374 Potential uses of the dataset include training procedural activity models, temporal grounding and  
375 detection, step recognition and anticipation, and mining task graphs.

376 **d) Is there anything about the composition of the dataset or the way it was collected and**  
377 **preprocessed/cleaned/labeled that might impact future uses?** For example, is there anything  
378 that a dataset consumer might need to know to avoid uses that could result in unfair treatment of  
379 individuals or groups (e.g., stereotyping, quality of service issues) or other risks or harms (e.g., legal  
380 risks, financial harms)? If so, please provide a description. Is there anything a dataset consumer could  
381 do to mitigate these risks or harms?

382 N/A.

383 **e) Are there tasks for which the dataset should not be used?** If so, please provide a description.

384 N/A.

## 385 **I.6 Distribution**

386 **a) Will the dataset be distributed to third parties outside of the entity (e.g., company, institution,**  
387 **organization) on behalf of which the dataset was created?** If so, please provide a description.

388 Yes. The dataset will be made publicly available.

389 **b) How will the dataset will be distributed (e.g., tarball on website, API, GitHub)?** Does the  
390 dataset have a digital object identifier (DOI)?

391 The dataset will be distributed through a dedicated website and an official test server will be set  
392 up and maintained on <https://eval.ai>. To maintain the anonymity of this submission, we will  
393 provide more details upon publication.

394 **c) When will the dataset be distributed?**

395 We will release HT-Step shortly after the decision is announced.

396 **d) Will the dataset be distributed under a copyright or other intellectual property (IP) license,**  
397 **and/or under applicable terms of use (ToU)?** If so, please describe this license and/or ToU, and  
398 provide a link or other access point to, or otherwise reproduce, any relevant licensing terms or ToU,  
399 as well as any fees associated with these restrictions.

400 HT-Step will be distributed under the CC BY NC SA licence, which can be found at [https:](https://creativecommons.org/licenses/by-nc-sa/2.0/)  
401 [//creativecommons.org/licenses/by-nc-sa/2.0/](https://creativecommons.org/licenses/by-nc-sa/2.0/).

402 **e) Have any third parties imposed IP-based or other restrictions on the data associated with**  
403 **the instances?** If so, please describe these restrictions, and provide a link or other access point  
404 to, or otherwise reproduce, any relevant licensing terms, as well as any fees associated with these  
405 restrictions.

406 No.

407 **f) Do any export controls or other regulatory restrictions apply to the dataset or to individual**  
408 **instances?** If so, please describe these restrictions, and provide a link or other access point to, or  
409 otherwise reproduce, any supporting documentation.

410 No.

411 **I.7 Maintenance**

412 **a) Who will be supporting/hosting/maintaining the dataset?**

413 We will support, host, and maintain the dataset. To maintain the anonymity of this submission, we  
414 will provide concrete details upon publication.

415 **b) How can the owner/curator/manager of the dataset be contacted (e.g., email address)?**

416 To maintain the anonymity of this submission, we will provide this information upon publication.

417 **c) Is there an erratum?** If so, please provide a link or other access point.

418 Not for the time being.

419 **d) Will the dataset be updated (e.g., to correct labeling errors, add new instances, delete**  
420 **instances)?** If so, please describe how often, by whom, and how updates will be communicated to  
421 dataset consumers (e.g., mailing list, GitHub)?

422 If any labeling corrections or new labels become available in the future, we will update the dataset,  
423 by providing a new version and clear documentation of the changes through the website.

424 **e) If the dataset relates to people, are there applicable limits on the retention of the data**  
425 **associated with the instances (e.g., were the individuals in question told that their data would**  
426 **be retained for a fixed period of time and then deleted)?** If so, please describe these limits and  
427 explain how they will be enforced.

428 No.

429 **f) Will older versions of the dataset continue to be supported/hosted/maintained?** If so, please  
430 describe how. If not, please describe how its obsolescence will be communicated to dataset consumers.

431 Yes.

432 **g) If others want to extend/augment/build on/contribute to the dataset, is there a mechanism**  
433 **for them to do so?** If so, please provide a description. Will these contributions be validated/verified?  
434 If so, please describe how. If not, why not? Is there a process for communicating/distributing these  
435 contributions to dataset consumers? If so, please provide a description.

436 No, we currently do not envision a process for this.

## References

- [1] Long Chen, Yulei Niu, Brian Chen, Xudong Lin, Guangxing Han, Christopher Thomas, Hammad Ayyubi, Heng Ji, and Shih-Fu Chang. Weakly-supervised temporal article grounding. In *Conference on Empirical Methods in Natural Language Processing*, pages 9402–9413, Abu Dhabi, United Arab Emirates, Dec. 2022. Association for Computational Linguistics. 4
- [2] Timnit Gebru, Jamie Morgenstern, Briana Vecchione, Jennifer Wortman Vaughan, Hanna Wallach, Hal Daumé III, and Kate Crawford. Datasheets for datasets. *Commun. ACM*, 64(12):86–92, nov 2021. 7
- [3] Tengda Han, Weidi Xie, and Andrew Zisserman. Temporal alignment networks for long-term video. In *IEEE Conference on Computer Vision and Pattern Recognition*, pages 2906–2916, June 2022. 4
- [4] Haroon Idrees, Amir R. Zamir, Yu-Gang Jiang, Alexander Gorban, Ivan Laptev, Rahul Sukthankar, and Mubarak Shah. The thumos challenge on action recognition for videos "in the wild". *Computer Vision and Image Understanding*, 155:1–23, 2017. 4
- [5] Mahnaz Koupaee and William Yang Wang. Wikihow: A large scale text summarization dataset. *ArXiv*, abs/1810.09305, 2018. wikiHow dataset license available at: <https://github.com/mahnazkoupaee/WikiHow-Dataset>. 7
- [6] Jie Lei, Tamara L. Berg, and Mohit Bansal. Qvhighlights: Detecting moments and highlights in videos via natural language queries. In *Neural Information Processing Systems*, 2021. 4
- [7] Xudong Lin, Fabio Petroni, Gedas Bertasius, Marcus Rohrbach, Shih-Fu Chang, and Lorenzo Torresani. Learning to recognize procedural activities with distant supervision. *arXiv preprint arXiv:2201.10990*, 2022. 2
- [8] Effrosyni Mavroudi, Triantafyllos Afouras, and Lorenzo Torresani. Learning to ground instructional articles in videos through narrations. *arXiv preprint arXiv:2306.03802*, 2023. 3, 4, 11
- [9] Antoine Miech, Jean-Baptiste Alayrac, Lucas Smaira, Ivan Laptev, Josef Sivic, and Andrew Zisserman. End-to-End Learning of Visual Representations from Uncurated Instructional Videos. In *CVPR*, 2020. 3
- [10] Antoine Miech, Dimitri Zhukov, Jean-Baptiste Alayrac, Ivan Laptev, and Josef Sivic. Howto100m: Learning a text-video embedding by watching hundred million narrated video clips. In *Proceedings of the IEEE International Conference on Computer Vision (ICCV)*, 2019. HT100M dataset license available at: <https://github.com/antoine77340/howto100m/blob/master/LICENSE>. 7
- [11] Yansong Tang, Dajun Ding, Yongming Rao, Yu Zheng, Danyang Zhang, Lili Zhao, Jiwen Lu, and Jie Zhou. Coin: A large-scale dataset for comprehensive instructional video analysis. In *IEEE Conference on Computer Vision and Pattern Recognition (CVPR)*, 2019. 4
- [12] Huiyu Wang, Mitesh Kumar Singh, and Lorenzo Torresani. Ego-only: Egocentric action detection without exocentric pretraining, 2023. 3
- [13] Chen-Lin Zhang, Jianxin Wu, and Yin Li. Actionformer: Localizing moments of actions with transformers. In *European Conference on Computer Vision*, volume 13664 of *LNCS*, pages 492–510, 2022. 3
- [14] Dimitri Zhukov, Jean-Baptiste Alayrac, Ramazan Gokberk Cinbis, David Fouhey, Ivan Laptev, and Josef Sivic. Cross-task weakly supervised learning from instructional videos. In *IEEE Conference on Computer Vision and Pattern Recognition*, pages 3537–3545, 2019. 4
